# Supplementary material for: USP4 promotes the proliferation, migration, and invasion of esophageal squamous cell carcinoma by targeting TAK1
Source: PubMed Central journal article supplement (PMC10638297; doi:10.1038/s41419-023-06259-0), 2023-11-10

Supplementary Figure 2

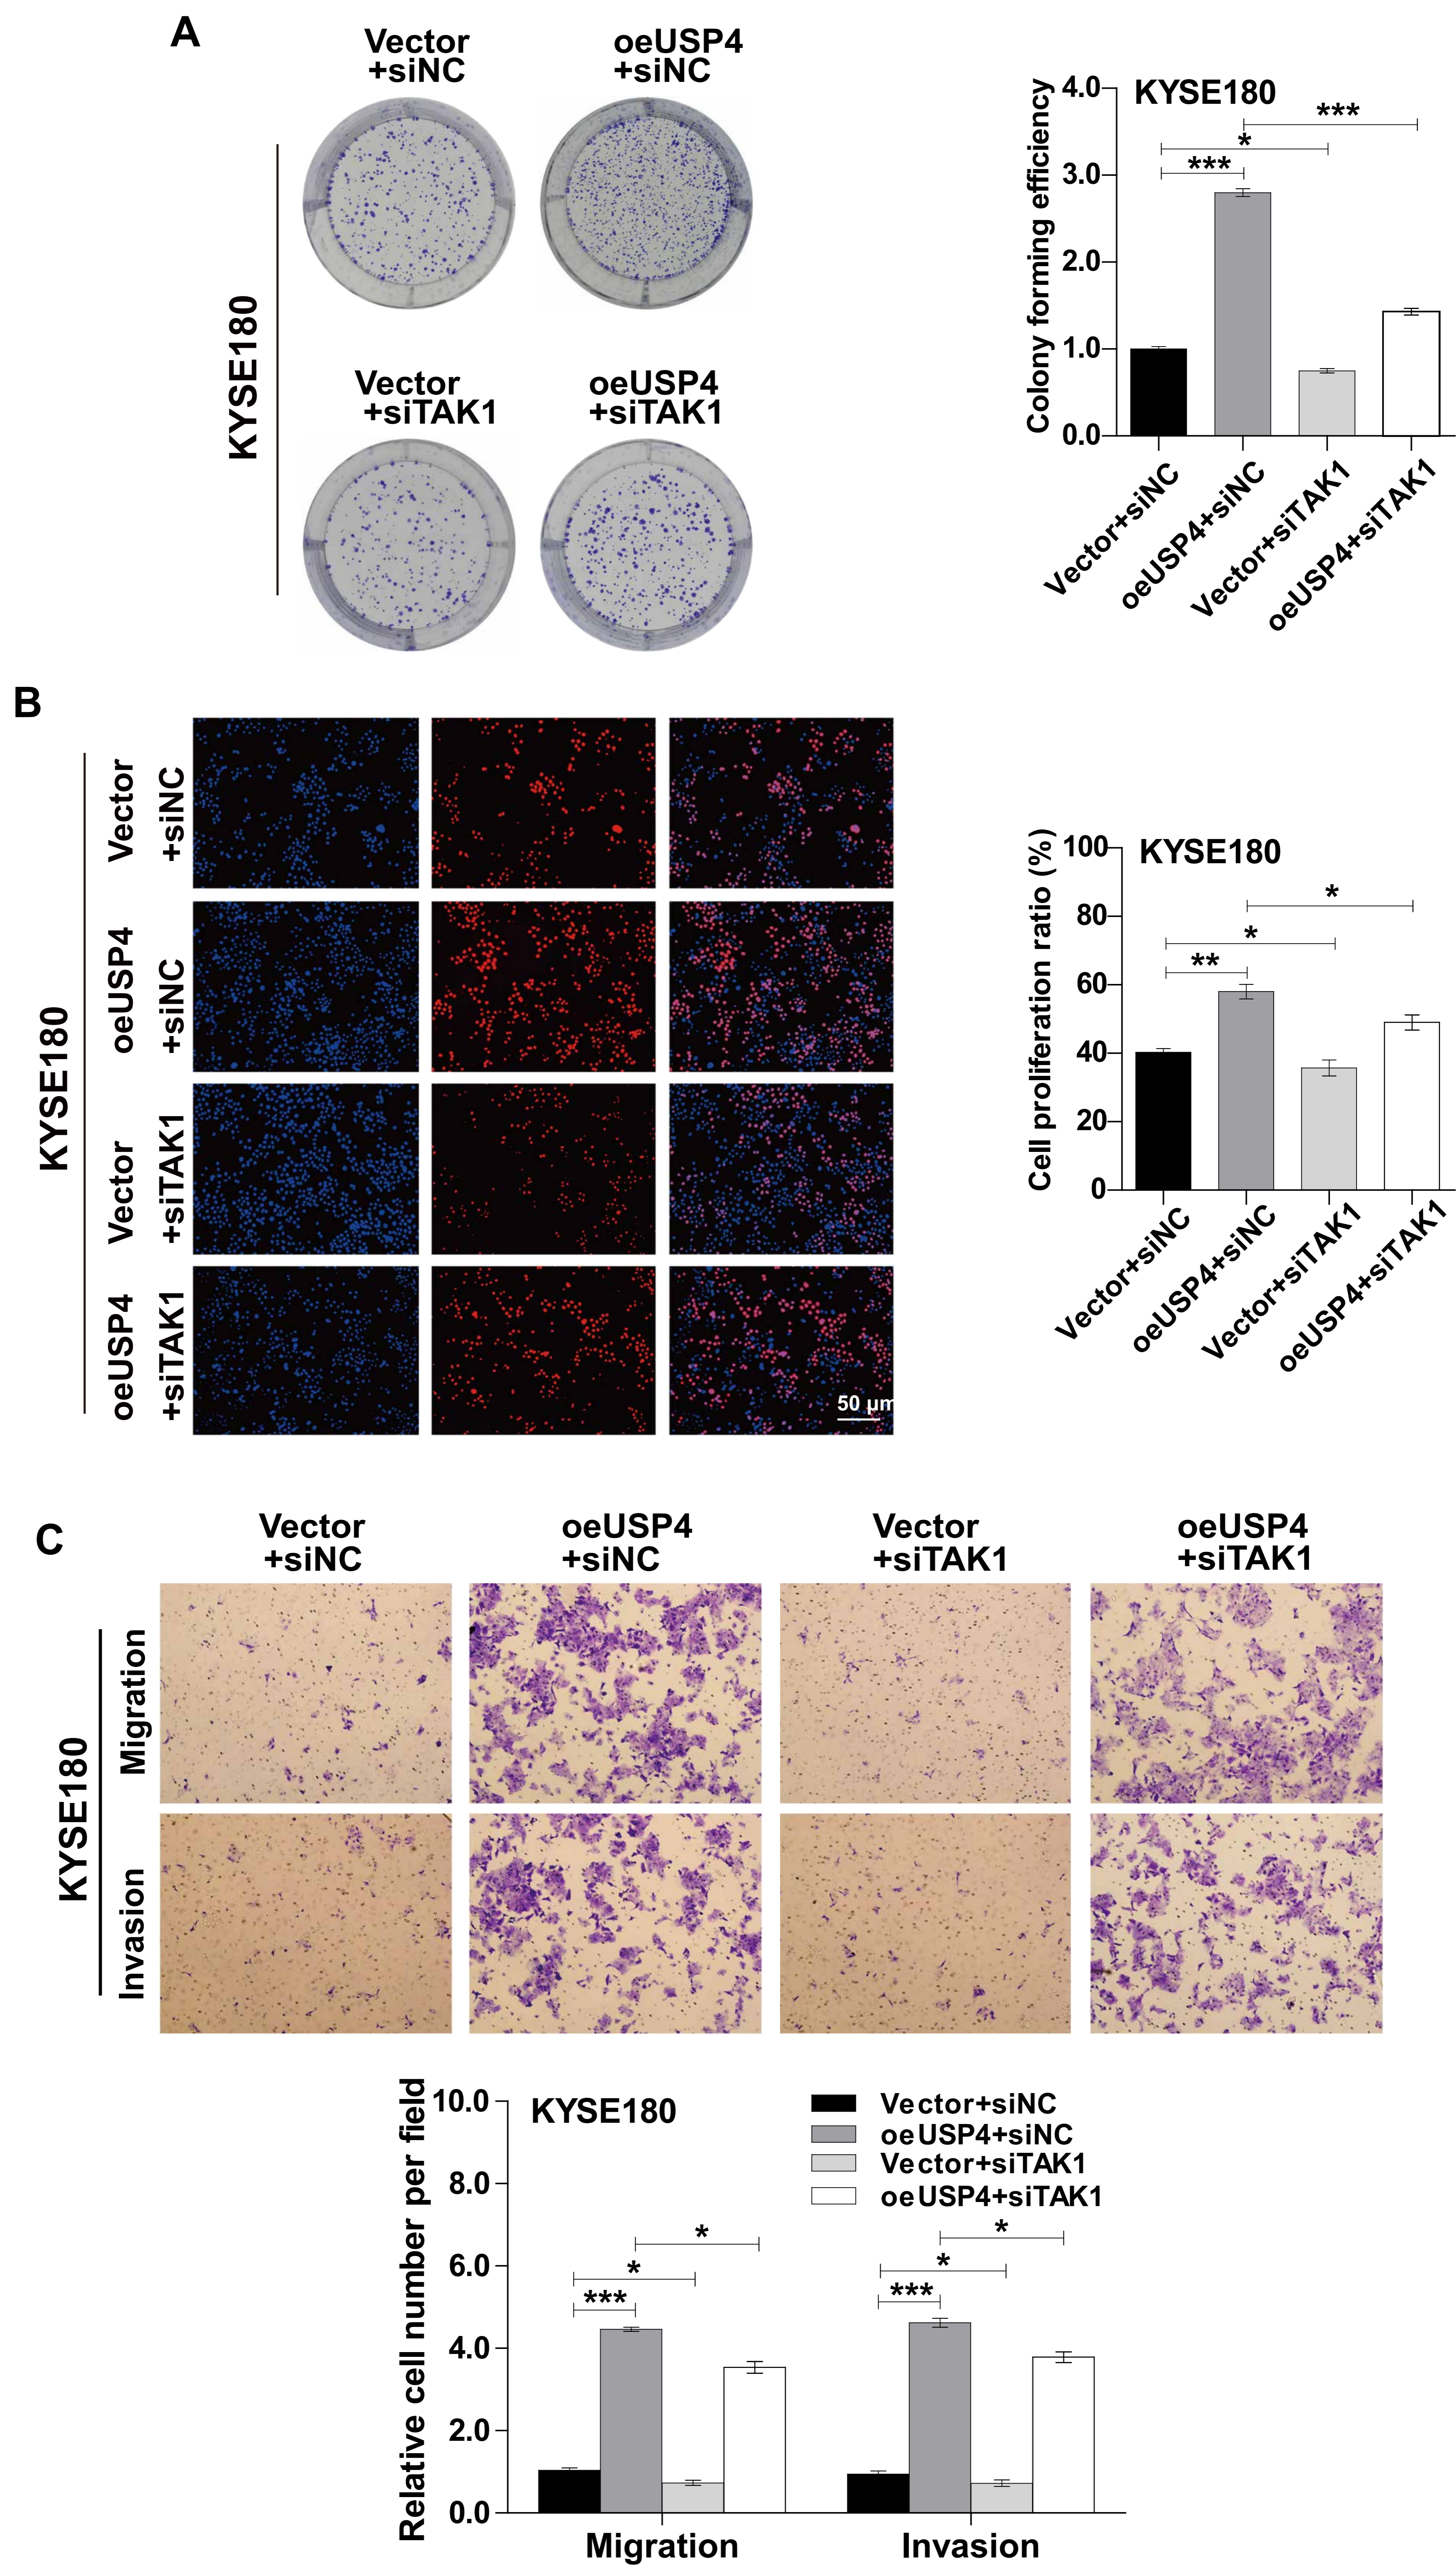

Supplement: 41419_2023_6259_MOESM3_ESM.pdf [file 41419_2023_6259_MOESM3_ESM.pdf]
