# Supplementary material for: USP4 promotes the proliferation, migration, and invasion of esophageal squamous cell carcinoma by targeting TAK1
Source: PubMed Central journal article supplement (PMC10638297; doi:10.1038/s41419-023-06259-0), 2023-11-10

Figure 2A

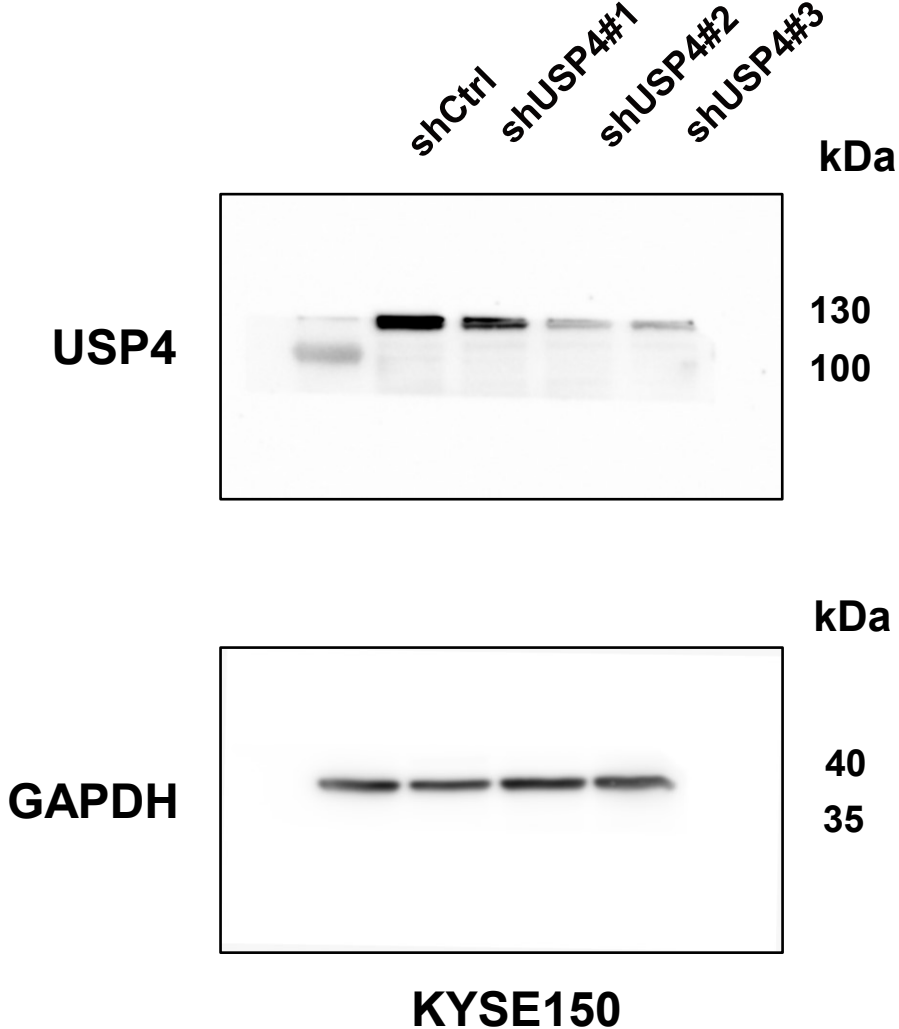

Figure 2B

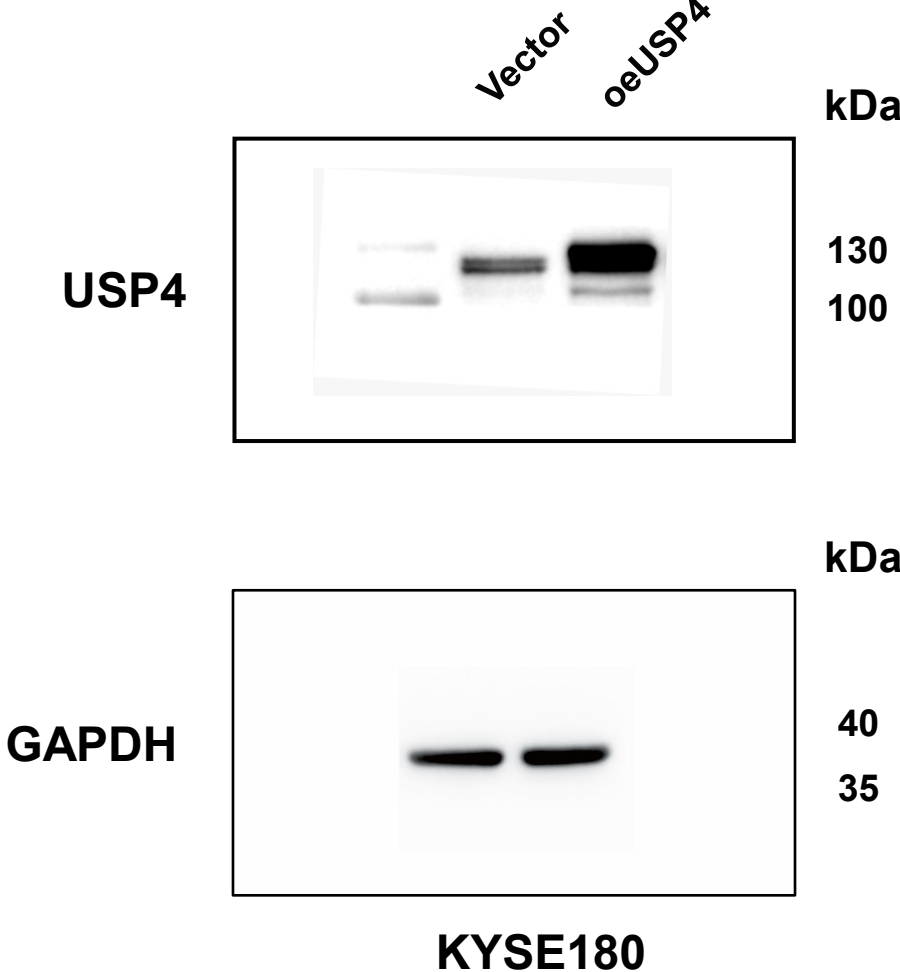

Figure 4H

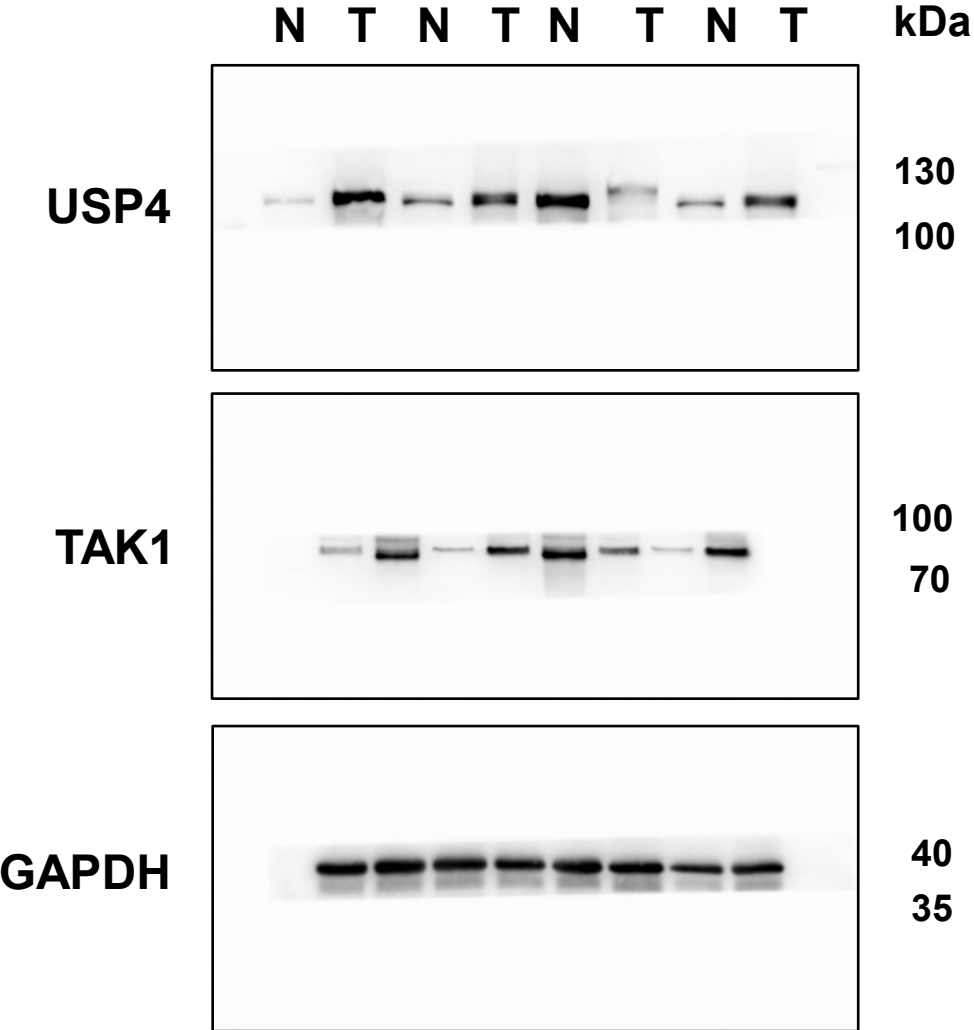

Figure 5A

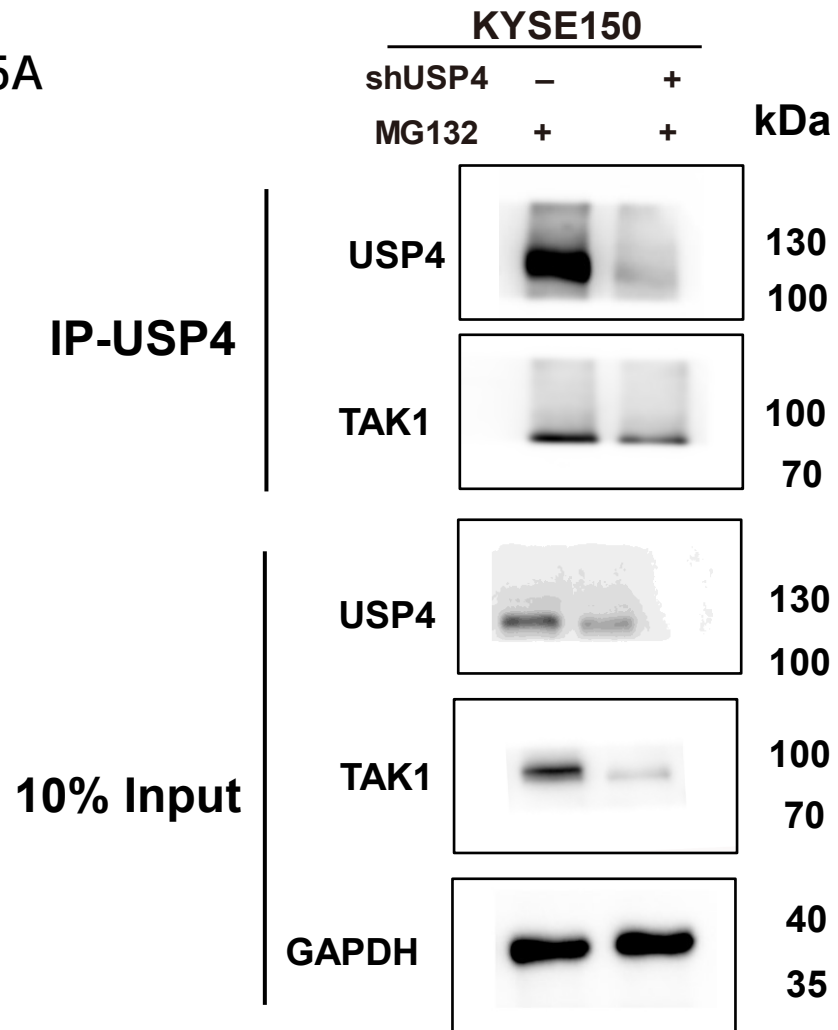

Figure 5B

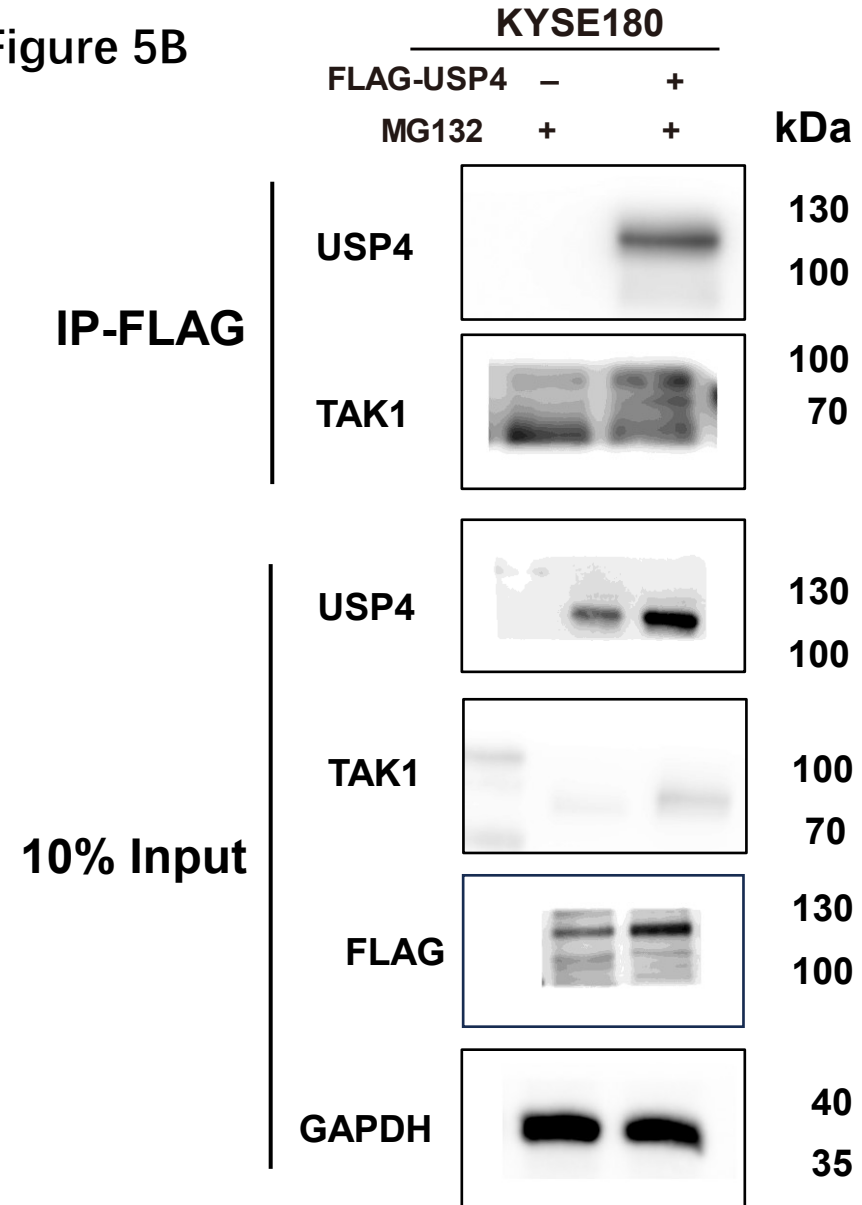

Figure 5C

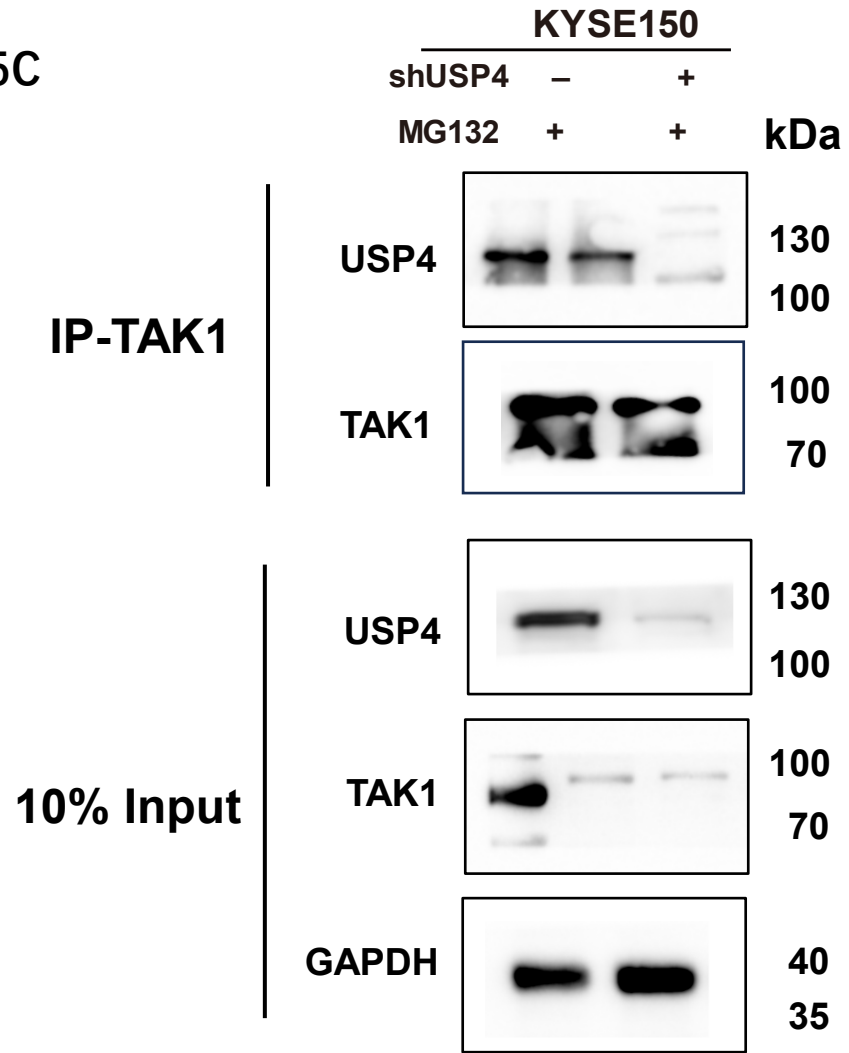

Figure 5D

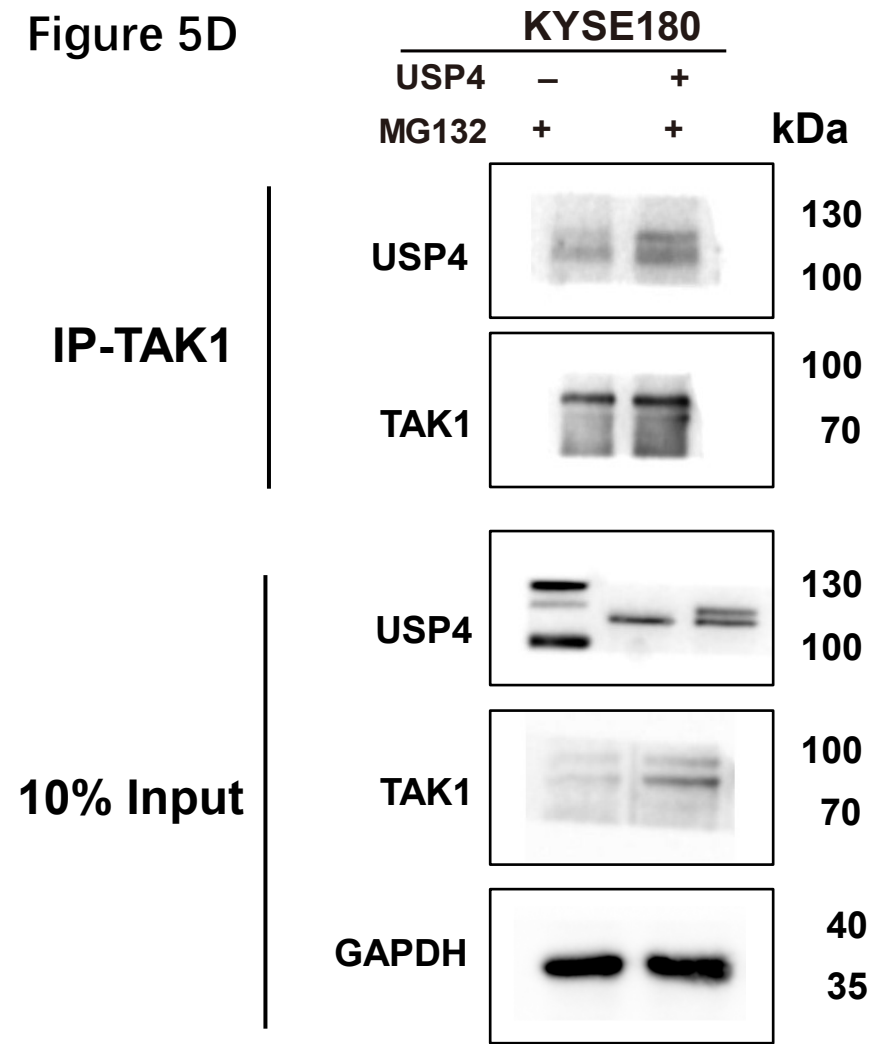

Figure 5E-F

KYSE150

KYSE180

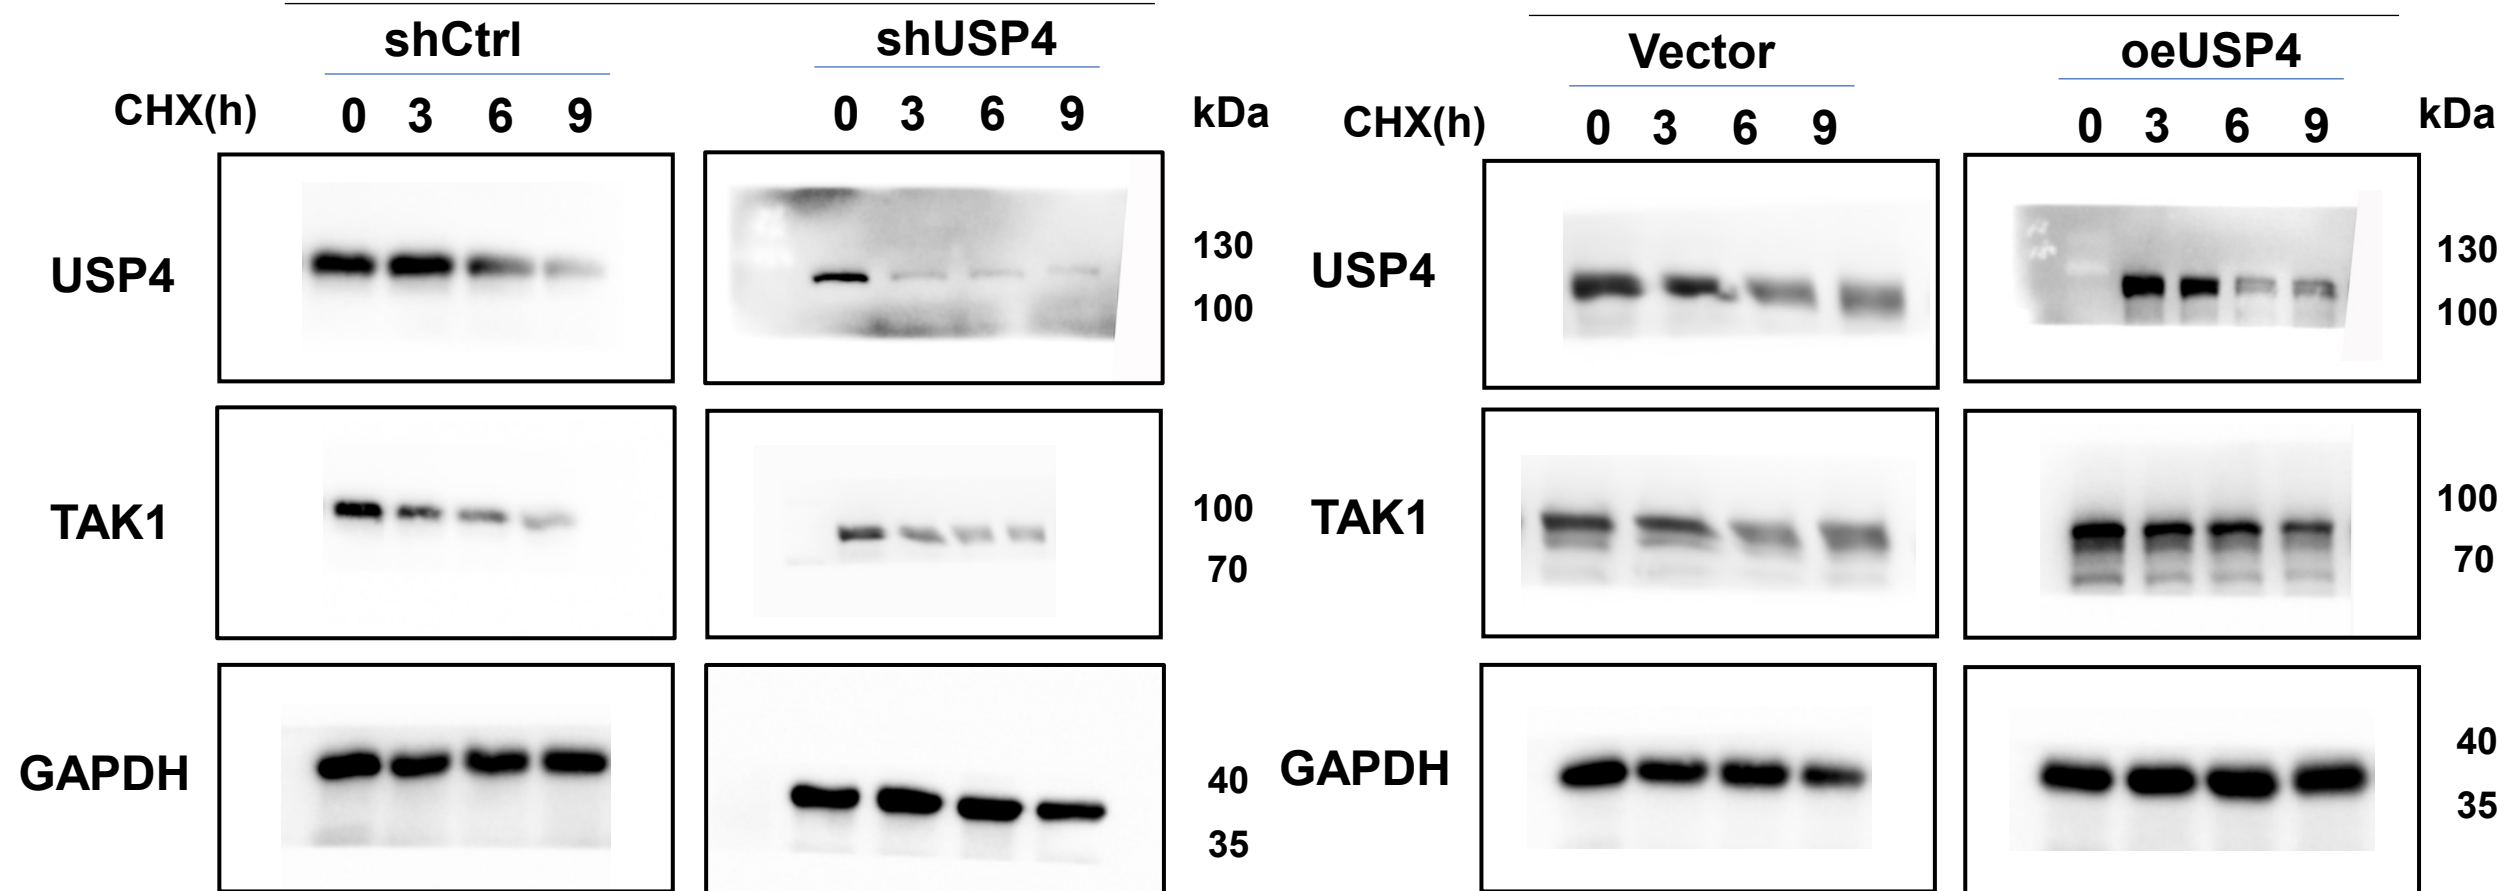

Figure 5G-H

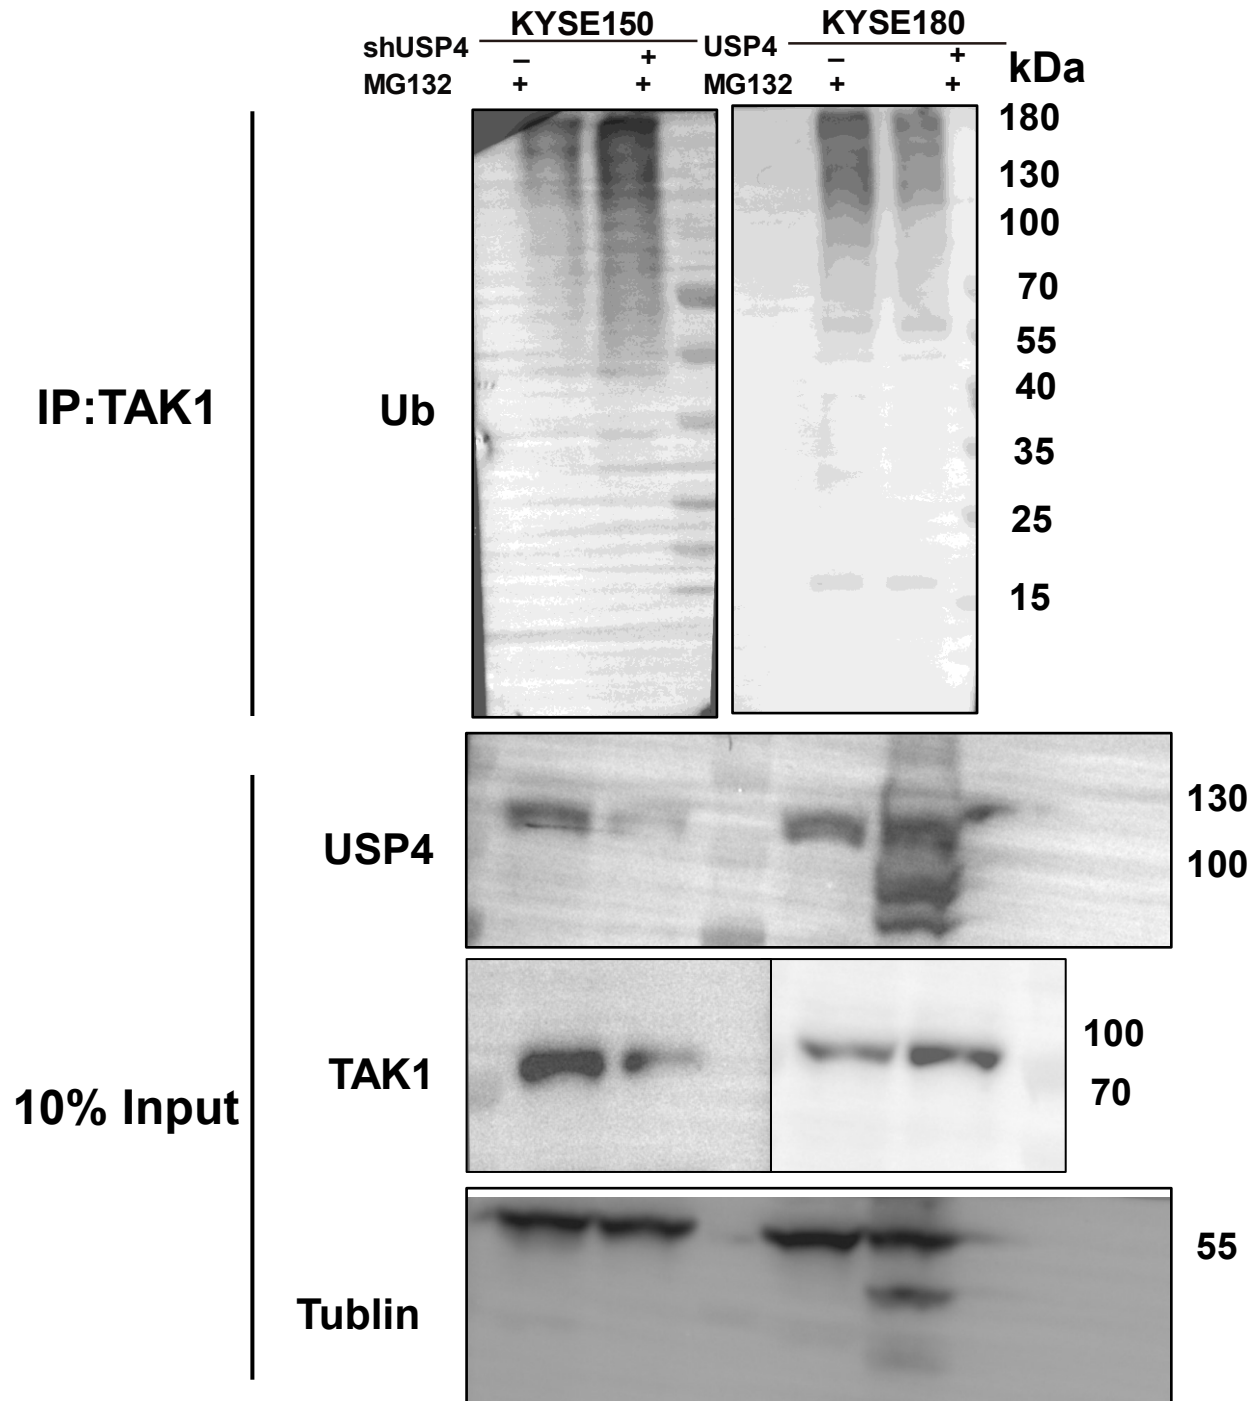

**Figure 5I**

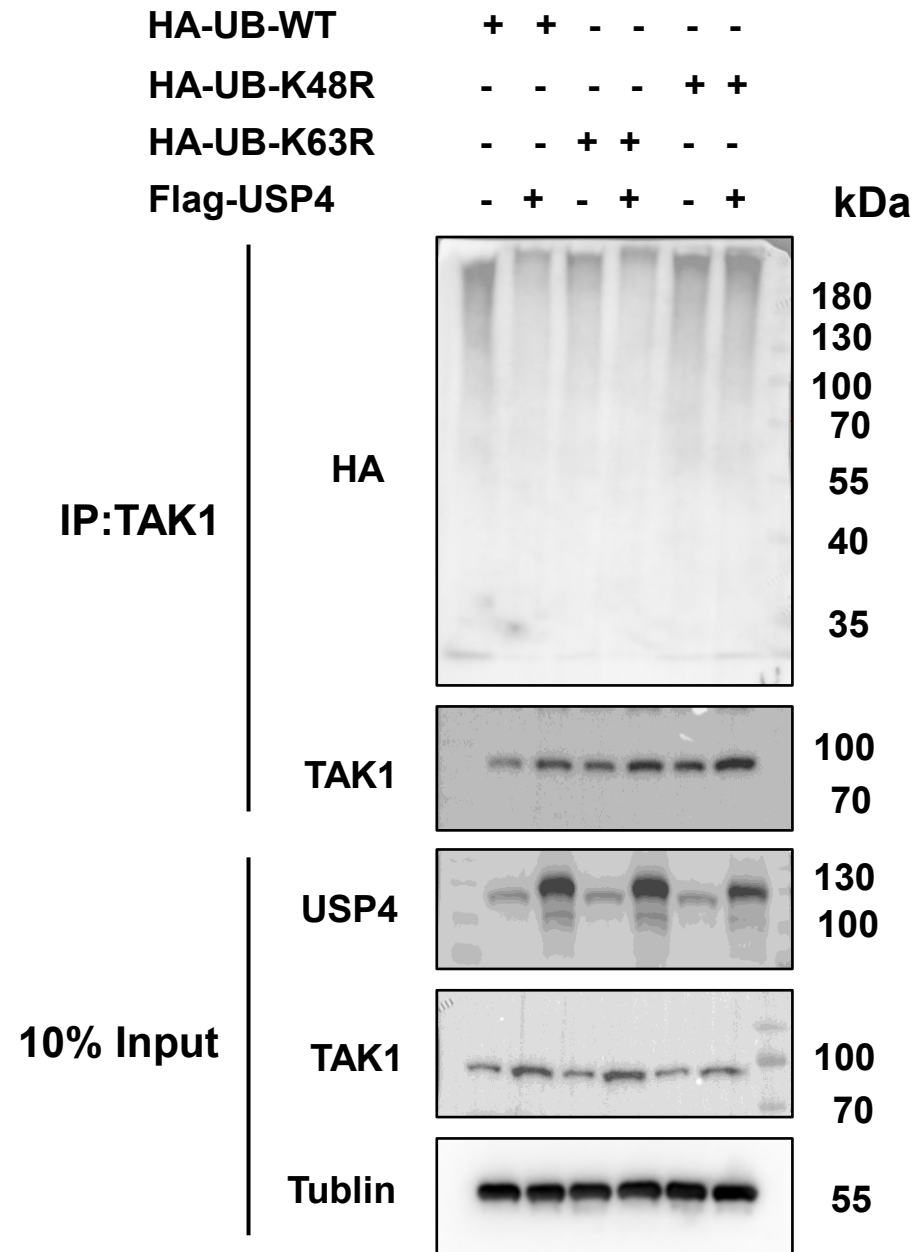

Supplement: 41419_2023_6259_MOESM7_ESM.pdf [file 41419_2023_6259_MOESM7_ESM.pdf]
